# Supplementary material for: Synthesis of Network Biobased Aliphatic Polyesters Exhibiting Better Tensile Properties than the Linear Polymers by ADMET Polymerization in the Presence of Glycerol Tris(undec-10-enoate)
Source: MDPI journal article supplement (doi:10.3390/polym16040468), 2024-02-07
Supplement: s1 [file s1]

## Supplementary Materials

for

# Synthesis of Soluble Network Biobased Aliphatic Polyesters Exhibiting Better Tensile Properties than the Linear Polymers by ADMET Polymerization of Bis(undec-10-enoate) with Isosorbide in the Presence of Tris(undec-10-enoate) with Glycerol

Lance O'Hari P. Go <sup>1</sup>, Mohamed Mehawed Abdellatif <sup>1</sup>, Ryoji Makino <sup>1</sup>, Daisuke Shimoyama <sup>1</sup>, Seiji Higashi <sup>2</sup>, Hiroshi Hirano <sup>2</sup> and Kotohiro Nomura <sup>1,\*</sup>

<sup>1</sup> Department of Chemistry, Tokyo Metropolitan University, 1-1 Minami Osawa, Hachioji, Tokyo 192-0397, Japan

<sup>2</sup> Osaka Research Institute of Industrial Science and Technology (ORIST), 1-6-50, Morinomiya, Joto-ku, Osaka 536-8553, Japan

\* Correspondence: ktnomura@tmu.ac.jp

## Contents

|                                                                                                             | page   |
|-------------------------------------------------------------------------------------------------------------|--------|
| 1. Selected NMR spectra of the prepared monomer, cross linker, and polymers.                                | S2-S7  |
| 2. Selected GPC traces of the prepared polymers.                                                            | S8,9   |
| 3. Additional results for the mechanical properties of the prepared polymers.                               | S10,11 |
| 4. Depolymerization of the prepared polyesters by catalytic transesterification using CpTiCl <sub>3</sub> . | S12-14 |
| 5. Thermal properties of the prepared polyesters.                                                           | S15    |

1. Selected NMR spectra of the prepared monomer, cross linker, and polymers.

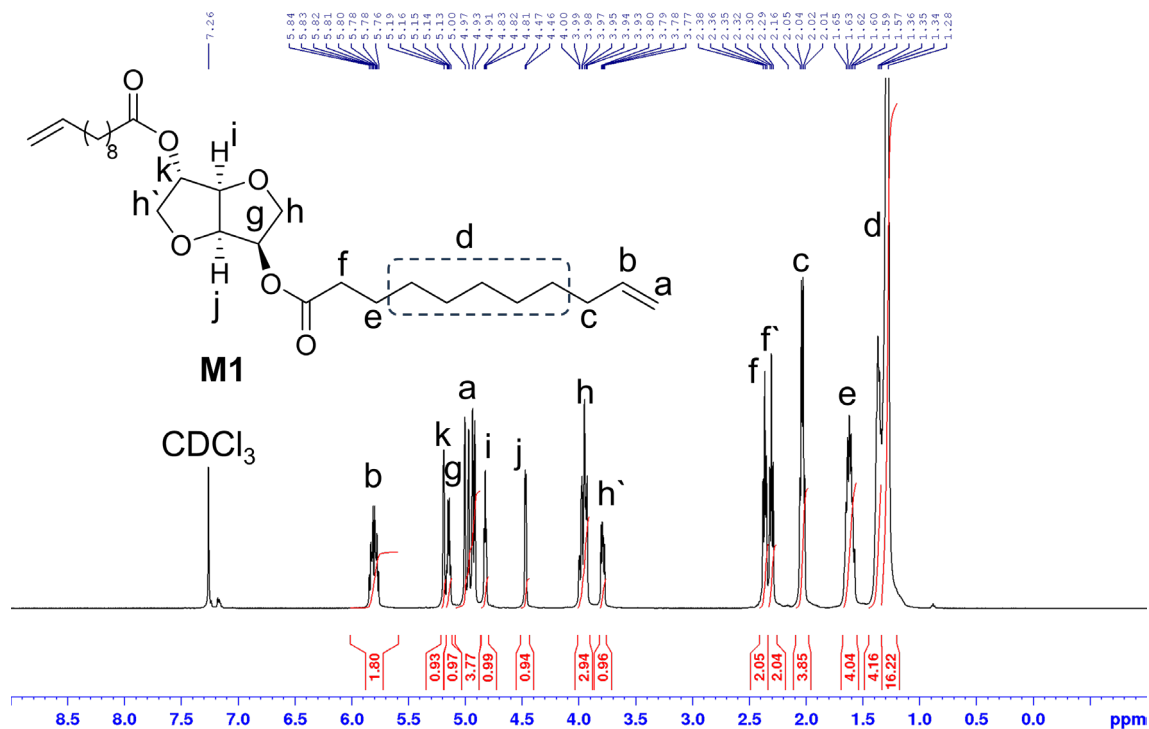

Figure S1. <sup>1</sup>H NMR spectrum (in CDCl<sub>3</sub> at 25 °C) for monomer (M1).

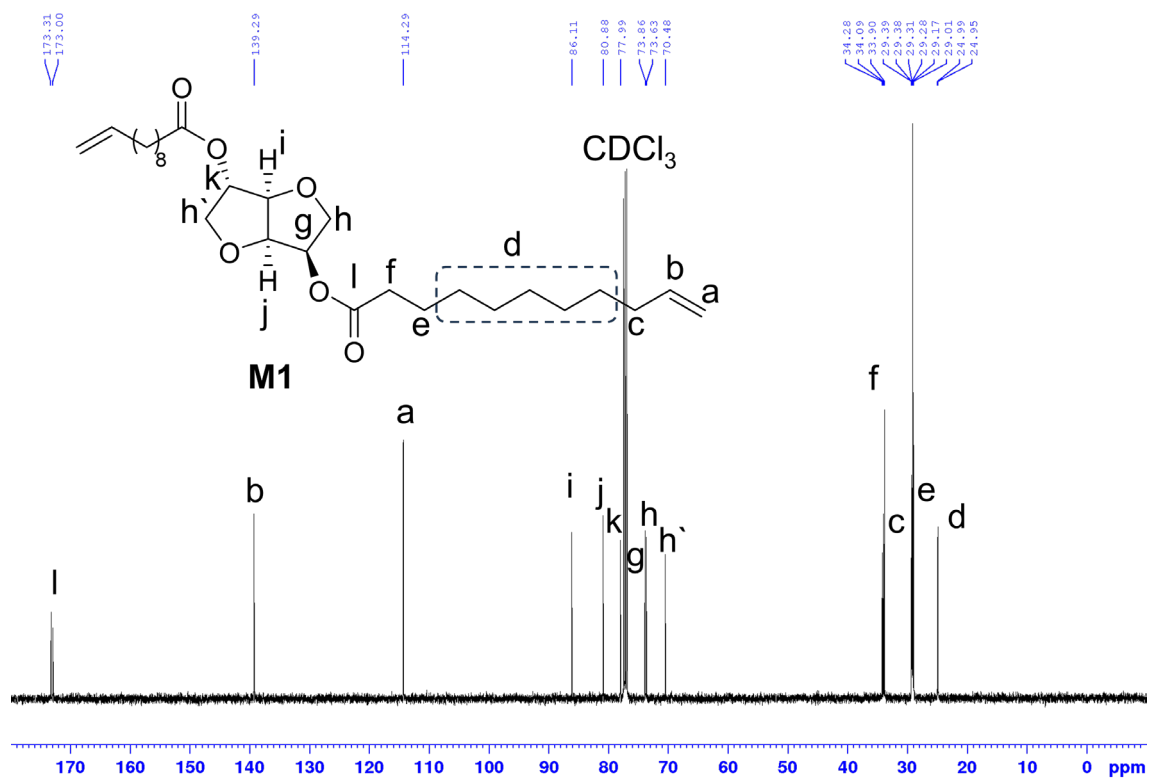

Figure S2. <sup>13</sup>C NMR spectrum (in CDCl<sub>3</sub> at 25 °C) for M1.

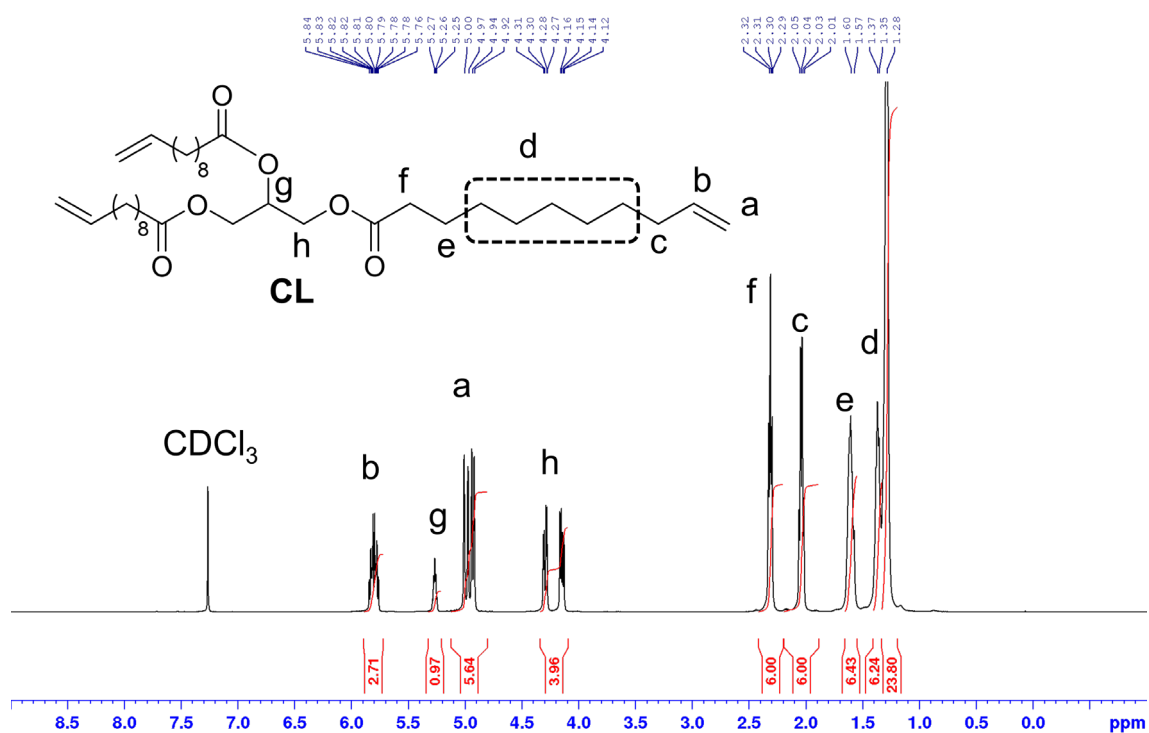

**Figure S3.** <sup>1</sup>H NMR spectrum (in CDCl<sub>3</sub> at 25 °C) for cross linker (CL).

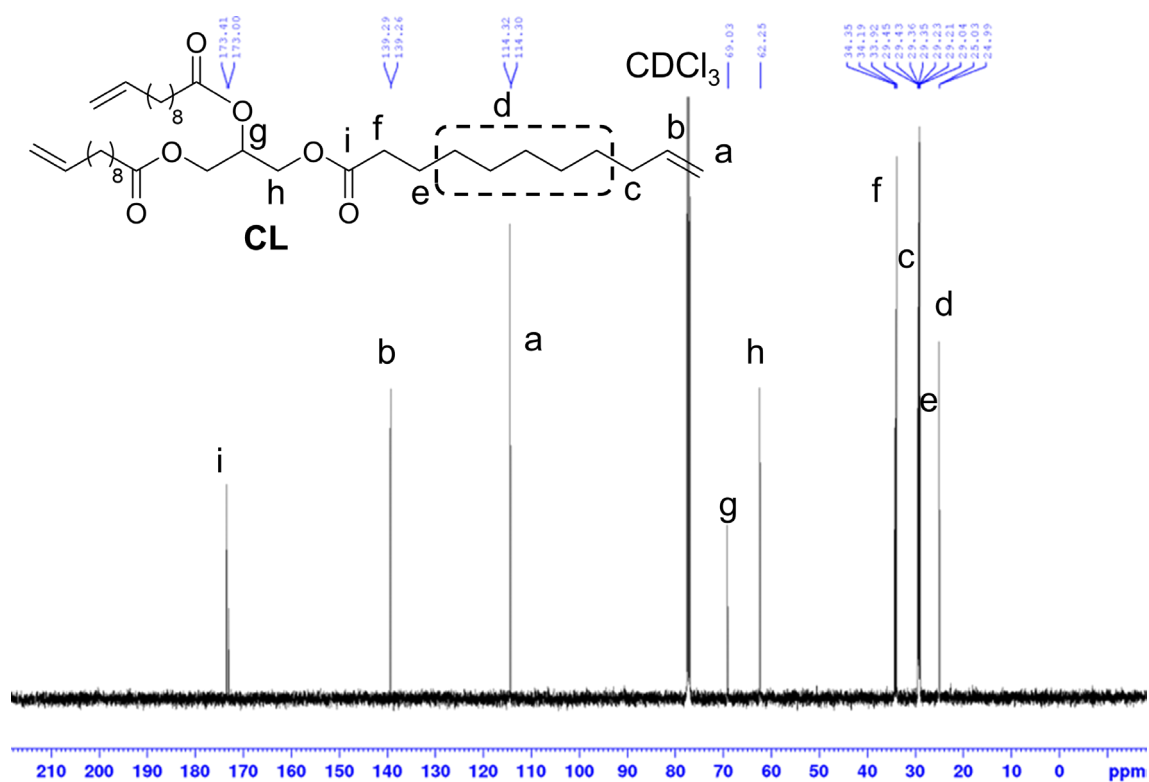

**Figure S4.** <sup>13</sup>C NMR spectrum (in CDCl<sub>3</sub> at 25 °C) for cross linker (CL).

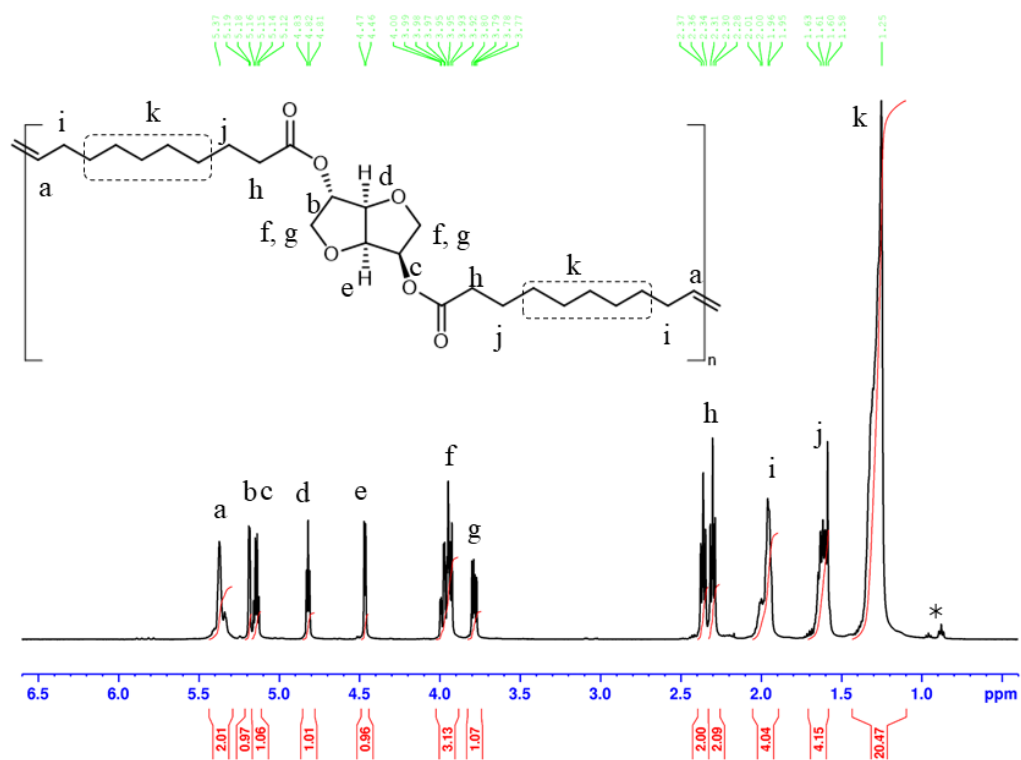

**Figure S5.**  $^1\text{H}$  NMR spectrum (in  $\text{CDCl}_3$  at  $25\text{ }^\circ\text{C}$ ) for ADMET polyester (**P1**).

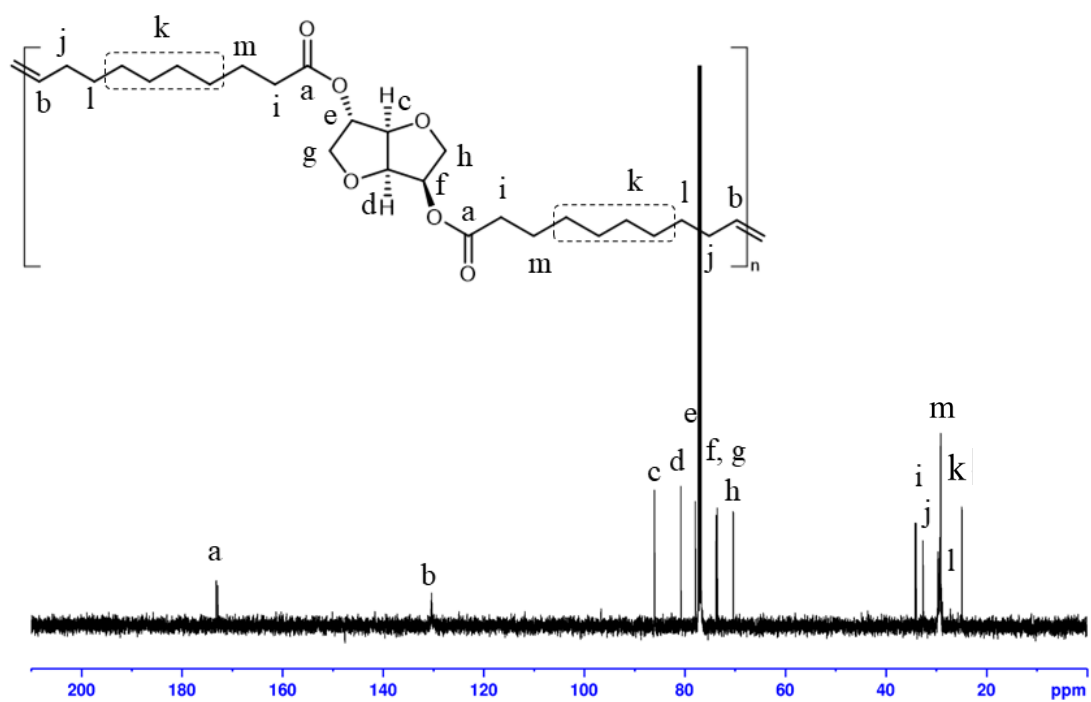

**Figure S6.**  $^{13}\text{C}$  NMR spectrum (in  $\text{CDCl}_3$  at  $25\text{ }^\circ\text{C}$ ) for ADMET polyester (**P1**).

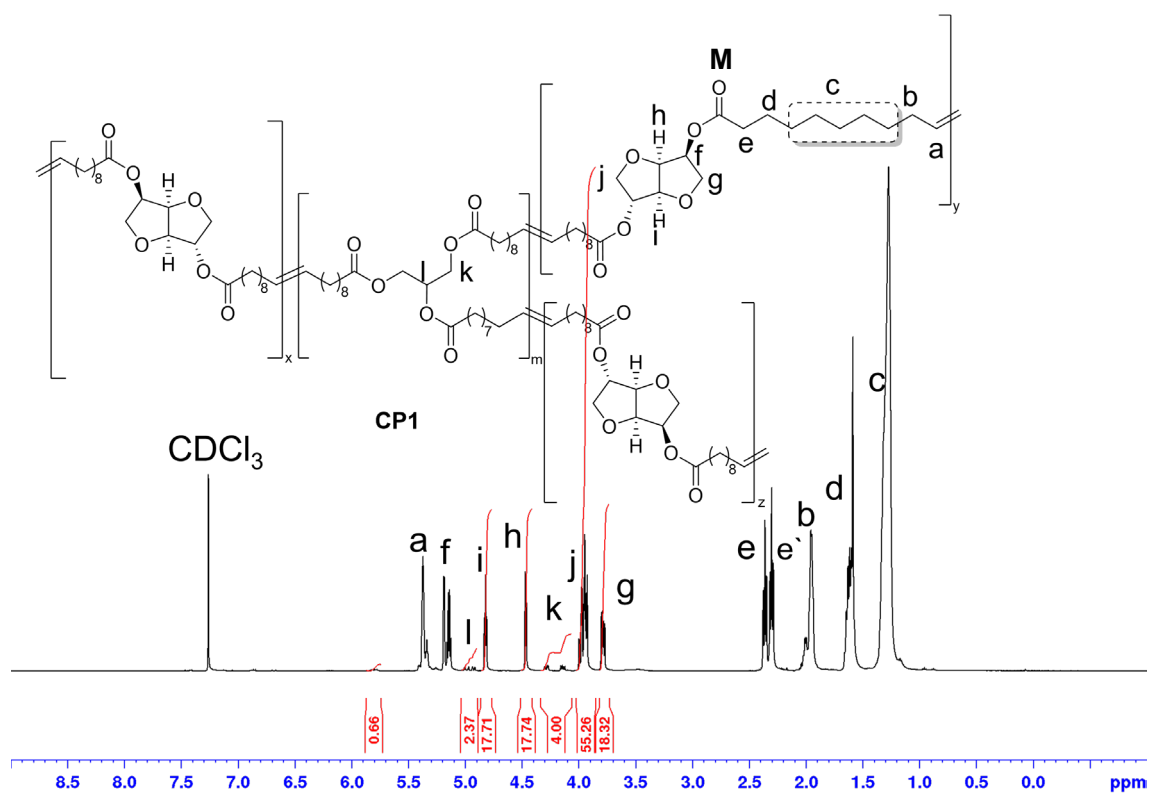

**Figure S7.**  $^1\text{H}$  NMR spectrum (in  $\text{CDCl}_3$  at  $25^\circ\text{C}$ ) for cross linked ADMET polyester (CP1).

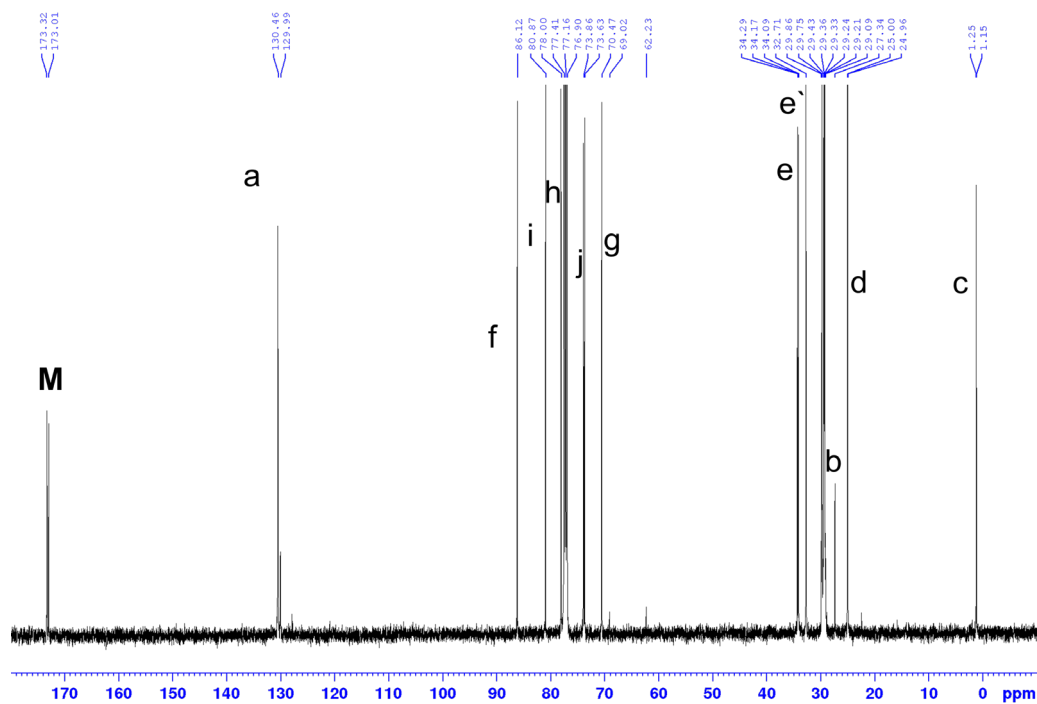

**Figure S8.**  $^{13}\text{C}$  NMR spectrum (in  $\text{CDCl}_3$  at  $25^\circ\text{C}$ ) for cross linked ADMET polyester (CP1).

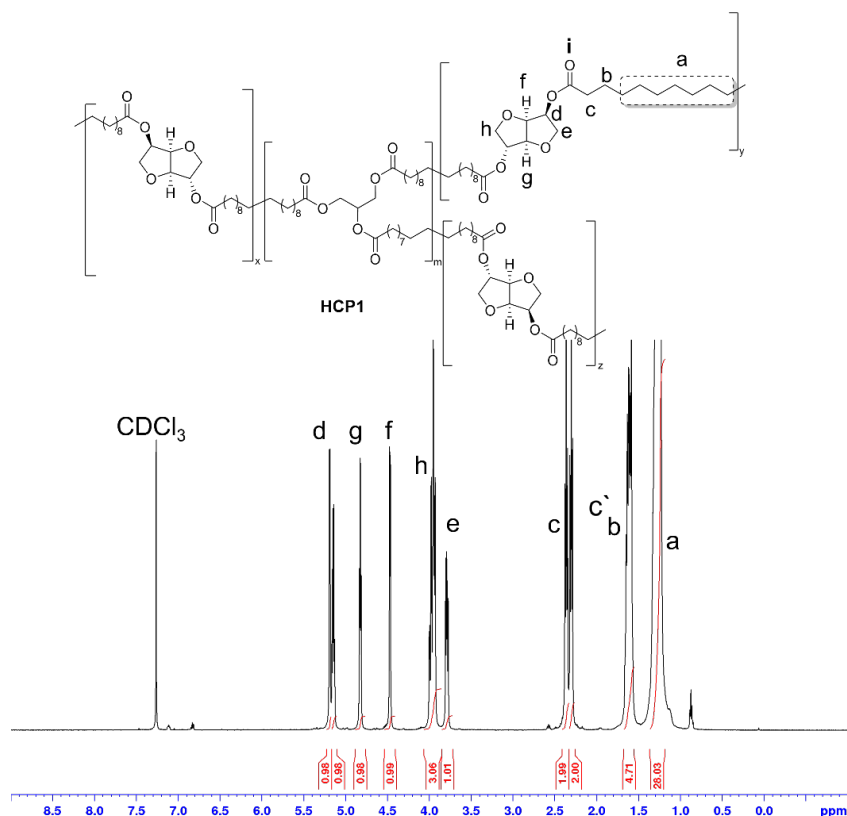

**Figure S9.** <sup>1</sup>H NMR spectrum (in CDCl<sub>3</sub> at 25 °C) for hydrogenated ADMET polyester (HCP1, Table 2- run 42) with 1.0 mol% of the cross linker (CL).

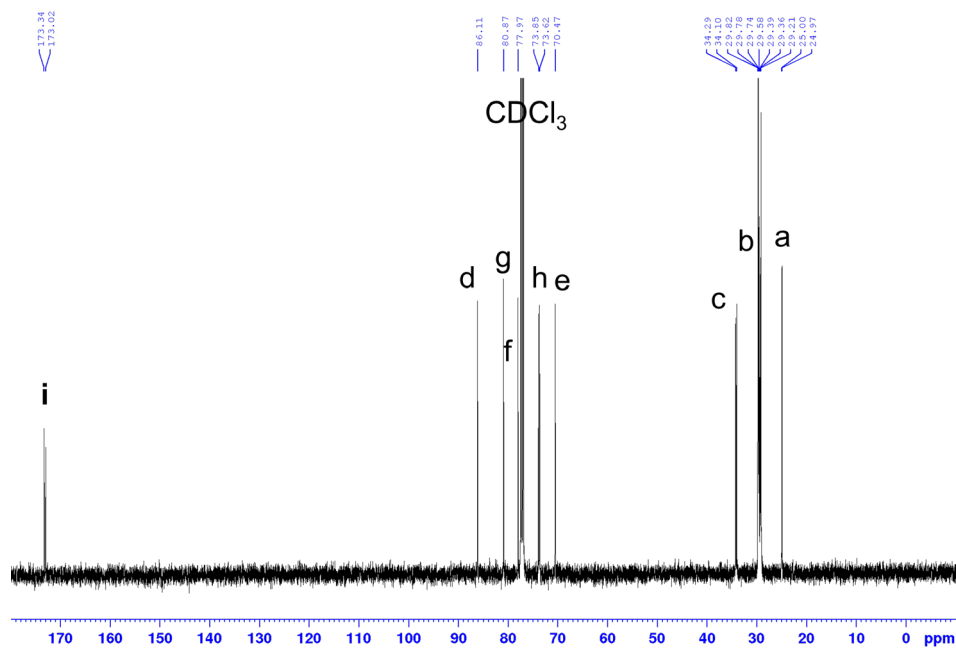

**Figure S10.** <sup>13</sup>C NMR spectrum (in CDCl<sub>3</sub> at 25 °C) for hydrogenated ADMET polyester (HCP1, Table 2- run 42) with 1.0 mol% of the cross linker (CL).

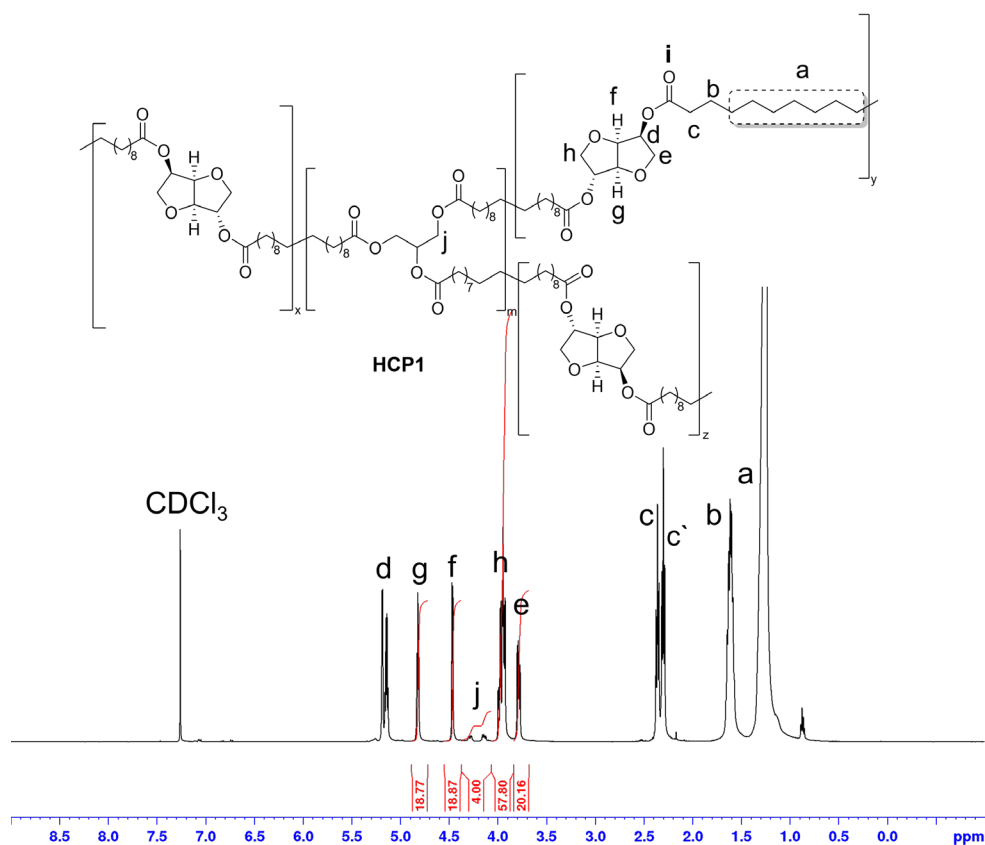

**Figure S11.**  $^1\text{H}$  NMR spectrum (in  $\text{CDCl}_3$  at 25 °C) for hydrogenated cross linked ADMET polyester (**HCP1**, Table 2- run 41) with 2.5 mol% of the cross linker (**CL**).

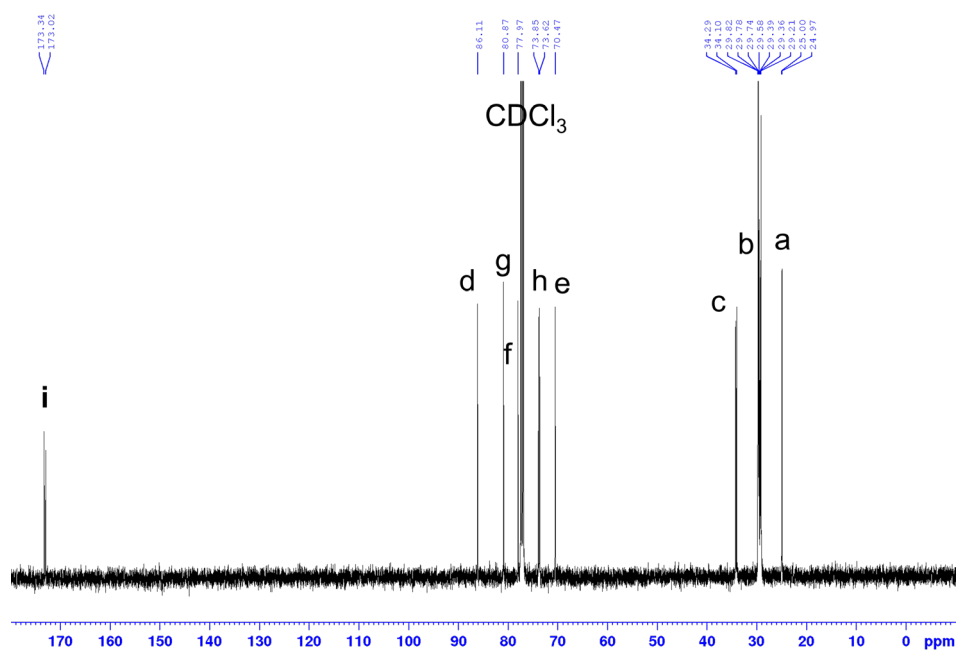

**Figure S12.**  $^{13}\text{C}$  NMR spectrum (in  $\text{CDCl}_3$  at 25 °C) for hydrogenated cross linked ADMET polyester (**HCP1**, Table 2- run 41) with 2.5 mol% of the cross linker (**CL**).

## 2. Selected GPC traces of the prepared polymers.

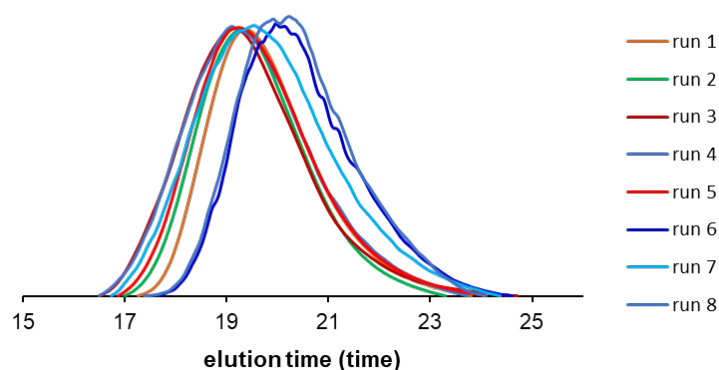

**Figure S13.** GPC traces for polyesters (**P1**) and cross linked polyesters (**CP1s**) with 0.5 and 1.0 mol% cross linker using a one step approach. (Table 1, runs 1-8)

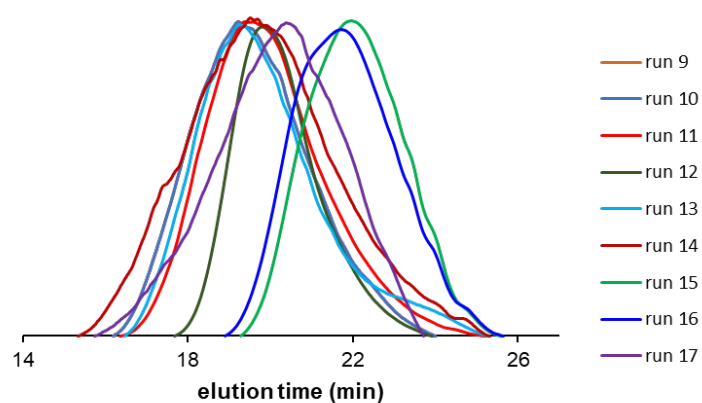

**Figure S14.** GPC traces for cross linked polyesters (**CP1s**) with 2.5 and 5.0 mol% cross linker using a one step approach. (Table 1, runs 9-16)

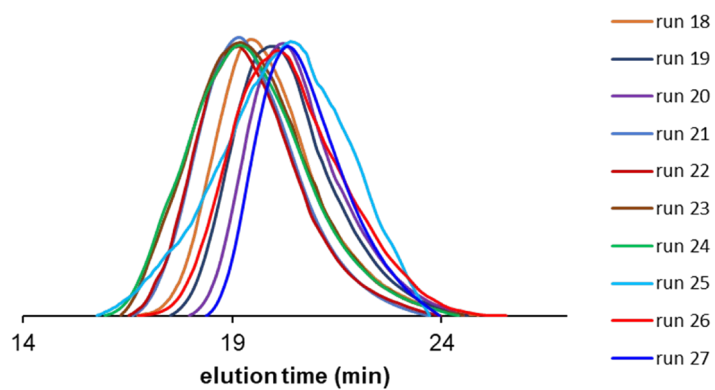

**Figure S15.** GPC traces for cross linked polyesters (**CP1s**) with 2.5 and 5.0 mol% cross linker using a two steps approach. (Table 1, runs 18-27)

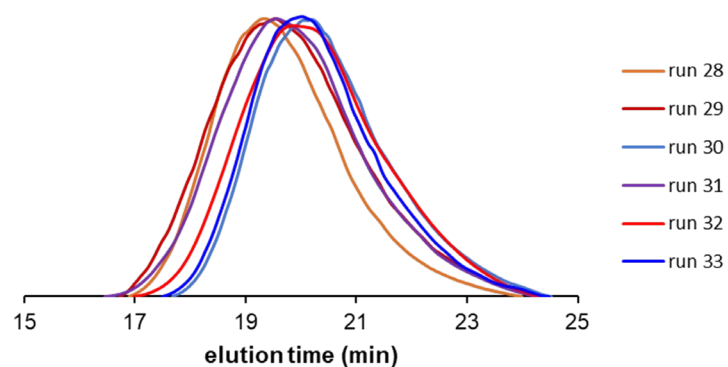

**Figure S16.** GPC traces for cross linked polyesters (**CP1s**) with 2.5 and 5.0 mol% cross linker using a two steps approach. (Table 1, runs 28-33)

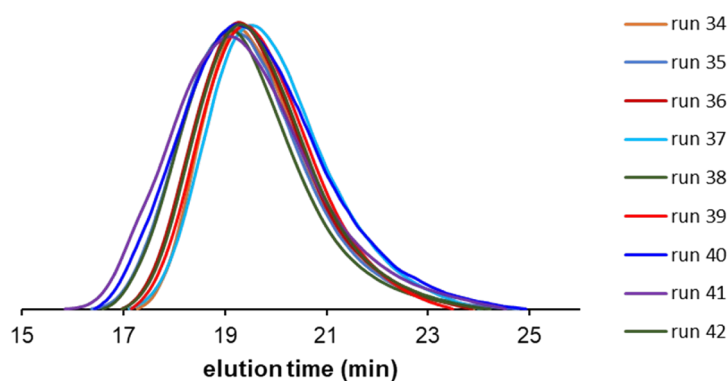

**Figure S17.** GPC traces for hydrogenated polyester (**HP1**) and hydrogenated cross linked polyesters (**HCP1s**) with 1.0 and 2.5 mol% cross linker using one step and two steps approaches. (Table 1, runs 34-42)

### 3. Additional results for the mechanical properties of the prepared polymers.

**Table S1.** Summary of the tensile properties of unsaturated network polyesters at a speed of 10 mm/min (23 °C, humidity 50±10 %).<sup>a</sup>

| sample                | CL<br>/ mol%<br>[approach] | $M_n^b$<br>×10 <sup>-3</sup> | $M_w/M_n^b$ | tensile<br>strength<br>/ MPa | elongation<br>at break<br>/ % | toughness<br>/ MJ/m <sup>3</sup> | yield<br>strength<br>/ MPa |
|-----------------------|----------------------------|------------------------------|-------------|------------------------------|-------------------------------|----------------------------------|----------------------------|
| <b>P1<sup>c</sup></b> | 0                          | 39.6                         | 1.89        | 17.3 (±2.2)                  | 506 (±44)                     | 49 (±7)                          | 4.8 (±0.4)                 |
| <b>CP1</b> (run 21)   | 1.0 [2 step]               | 36.6                         | 2.79        | 24.6 (±1.1)                  | 798 (±47)                     | 95 (±8)                          | 4.6 (±0.1)                 |
| <b>CP1</b> (run 22)   | 1.0 [2 step]               | 35.8                         | 3.00        | 21.3 (±2.0)                  | 816 (±48)                     | 88 (±9)                          | 3.7 (±0.2)                 |
| <b>CP1</b> (run 4)    | 1.0 [1 step]               | 34.8                         | 3.11        | 18.6 (±0.5)                  | 807 (±5)                      | 74 (±3)                          | 3.9 (±0.2)                 |
| <b>CP1</b> (run 1)    | 0                          | 30.3                         | 2.11        | 15.4 (±1.2)                  | 444 (±28)                     | 41 (±4)                          | 4.3 (±0.2)                 |
| <b>CP1</b> (run 28)   | 1.0 [2 step]               | 31.2                         | 2.54        | 17.2 (±0.7)                  | 707 (±21)                     | 65 (±4)                          | 4.6 (±0.1)                 |
| <b>CP1</b> (run 5)    | 1.0 [1 step]               | 32.2                         | 2.64        | 18.4 (±0.7)                  | 710 (±66)                     | 68 (±9)                          | 4.5 (±0.3)                 |
| <b>CP1</b> (run 23)   | 2.5 [2 step]               | 31.1                         | 4.13        | 19.7 (±1.5)                  | 704 (±59)                     | 70 (±9)                          | 4.2 (±0.1)                 |
| <b>CP1</b> (run 10)   | 2.5 [1 step]               | 29.6                         | 4.14        | 17.8 (±1.3)                  | 696 (±19)                     | 67 (±4)                          | 4.4 (±0.1)                 |
| <b>CP1</b> (run 24)   | 2.5 [2 step]               | 32.0                         | 4.48        | 19.8 (±1.4)                  | 578 (±101)                    | 61 (±15)                         | 4.3 (±0.1)                 |

<sup>a</sup>Stress/strain experiments were conducted using Shimadzu Universal Testing Instruments (Autograph AGS-10kNX, max load cell capacity of 500 N). The test specimens had the following dimensions: a gauge length of 1.0 mm; a width of 1.0 cm; a length of 2.5 cm; and a thickness of 0.1 mm. <sup>b</sup>GPC data in THF vs polystyrene standards. <sup>c</sup>Cited from reference 1.

**Table S2.** Summary of the tensile properties of hydrogenated linear and network polyesters at a speed of 10 mm/min (23 °C, humidity 50±10 %).<sup>a</sup>

| sample                 | CL<br>/ mol%<br>[approach] | $M_n^b$<br>×10 <sup>-3</sup> | $M_w/M_n^b$ | tensile<br>strength<br>/ MPa | elongation<br>at break<br>/ % | toughness<br>/ MJ/m <sup>3</sup> | yield<br>strength<br>/ MPa |
|------------------------|----------------------------|------------------------------|-------------|------------------------------|-------------------------------|----------------------------------|----------------------------|
| <b>HP1<sup>c</sup></b> | 0                          | 40.9                         | 2.41        | 33.7 (±2.2)                  | 413 (±13)                     | 74 (±7)                          | 7.3 (±0.8)                 |
| <b>HCP1</b> (run 38)   | 1.0 [2 step]               | 37.3                         | 2.92        | 36.9 (±3.8)                  | 555 (±21)                     | 126 (±13)                        | 9.5 (±0.4)                 |
| <b>HCP1</b> (run 39)   | 1.0 [2 step]               | 35.3                         | 2.98        | 32.5 (±2.4)                  | 515 (±47)                     | 101 (±17)                        | 8.2 (±0.8)                 |
| <b>HCP1</b> (run 35)   | 1.0 [1 step]               | 34.8                         | 3.10        | 29.1 (±4.3)                  | 453 (±74)                     | 82 (±24)                         | 8.5 (±0.2)                 |
| <b>HCP1</b> (run 34)   | 0                          | 30.7                         | 2.22        | 20.8 (±1.3)                  | 282 (±14)                     | 37 (±4)                          | 8.1 (±0.2)                 |
| <b>HCP1</b> (run 42)   | 1.0 [2 step]               | 31.4                         | 2.46        | 35.4 (±0.6)                  | 572 (±1)                      | 125 (±1)                         | 9.6 (±0.2)                 |
| <b>HCP1</b> (run 36)   | 1.0 [1 step]               | 32.6                         | 2.47        | 34.7 (±0.6)                  | 537 (±7)                      | 116 (±4)                         | 9.6 (±0.2)                 |
| <b>HCP1</b> (run 40)   | 2.5 [2 step]               | 30.5                         | 3.91        | 31.9 (±1.6)                  | 457 (±65)                     | 94 (±18)                         | 9.9 (±0.1)                 |
| <b>HCP1</b> (run 37)   | 2.5 [1 step]               | 28.3                         | 4.05        | 33.0 (±0.6)                  | 463 (±58)                     | 99 (±16)                         | 10.5 (±0.1)                |
| <b>HCP1</b> (run 41)   | 2.5 [2 step]               | 32.2                         | 4.39        | 23.7 (±7.3)                  | 228 (±55)                     | 37 (±16)                         | 10.3 (±0.5)                |

<sup>a</sup>Stress/strain experiments were conducted using a compact high-performance tensile tester by Acroedge Co., Ltd. (Stency model OZ918, max load cell capacity of 50 N). The test specimens had the following dimensions: a gauge length of 1.0 mm; a width of 1.0 cm; a length of 2.5 cm; and a thickness of 0.1 mm. <sup>b</sup>GPC data in THF vs polystyrene standards. <sup>c</sup>Cited from reference 1.

#### 4. Depolymerization of saturated network polyesters by catalytic transesterification.

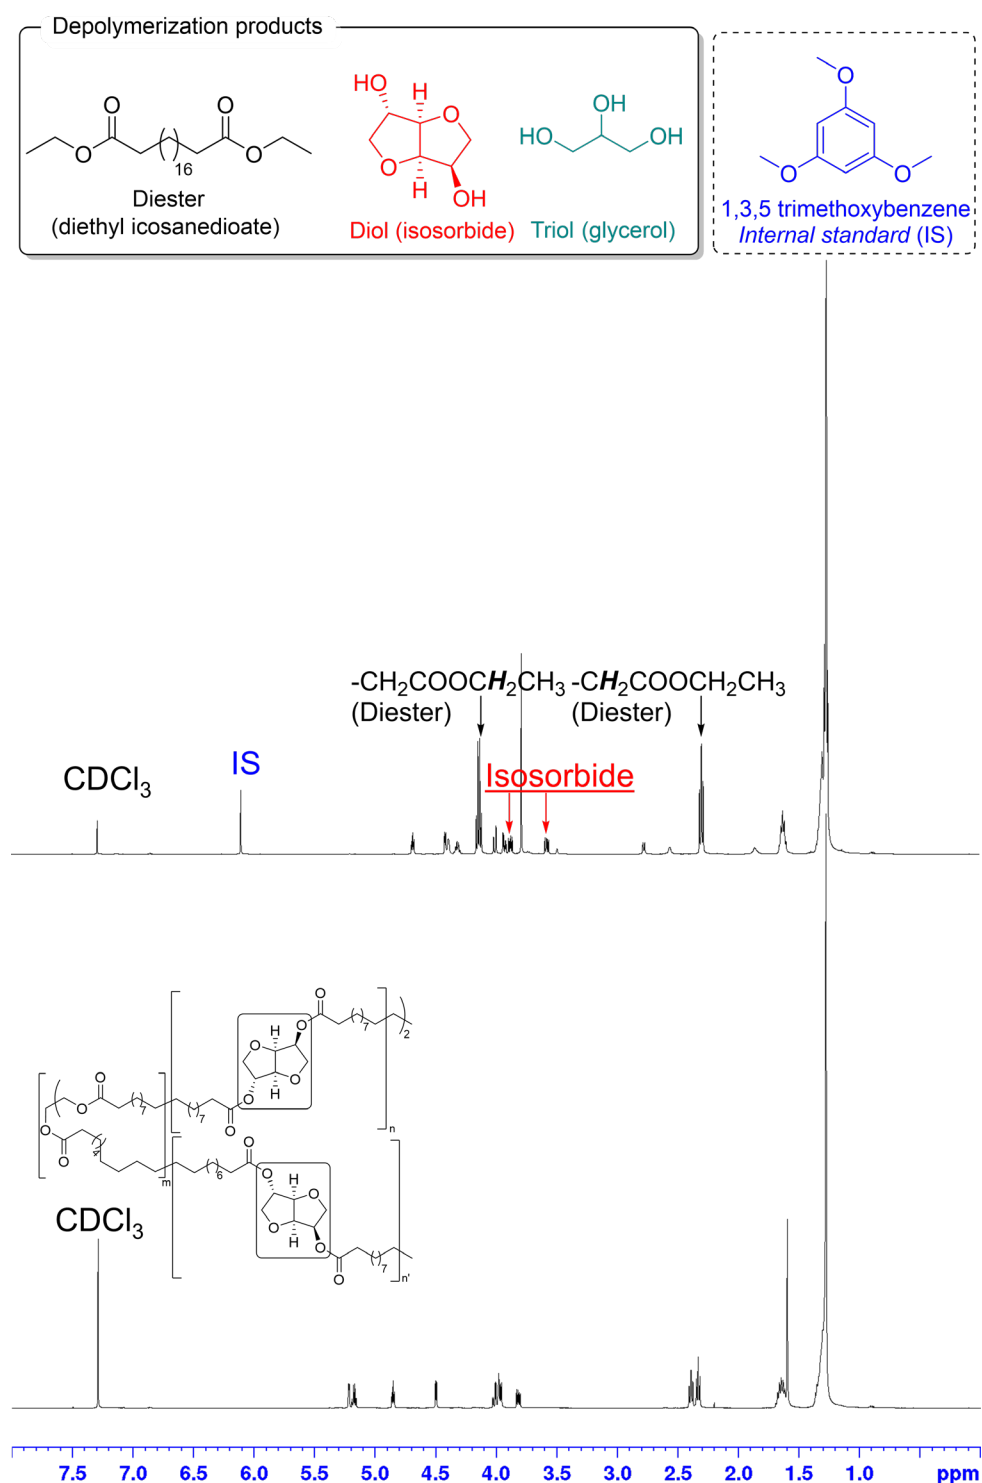

**Figure S18.** <sup>1</sup>H NMR spectrum (in CDCl<sub>3</sub> at 25 °C) of (top) depolymerized network polyester (**HCP1**, Table 2, run 41) and (bottom) network polyester (**HCP1**, Table 2, run 41). IS: Internal standard (1, 3, 5-trimethoxybenzene).

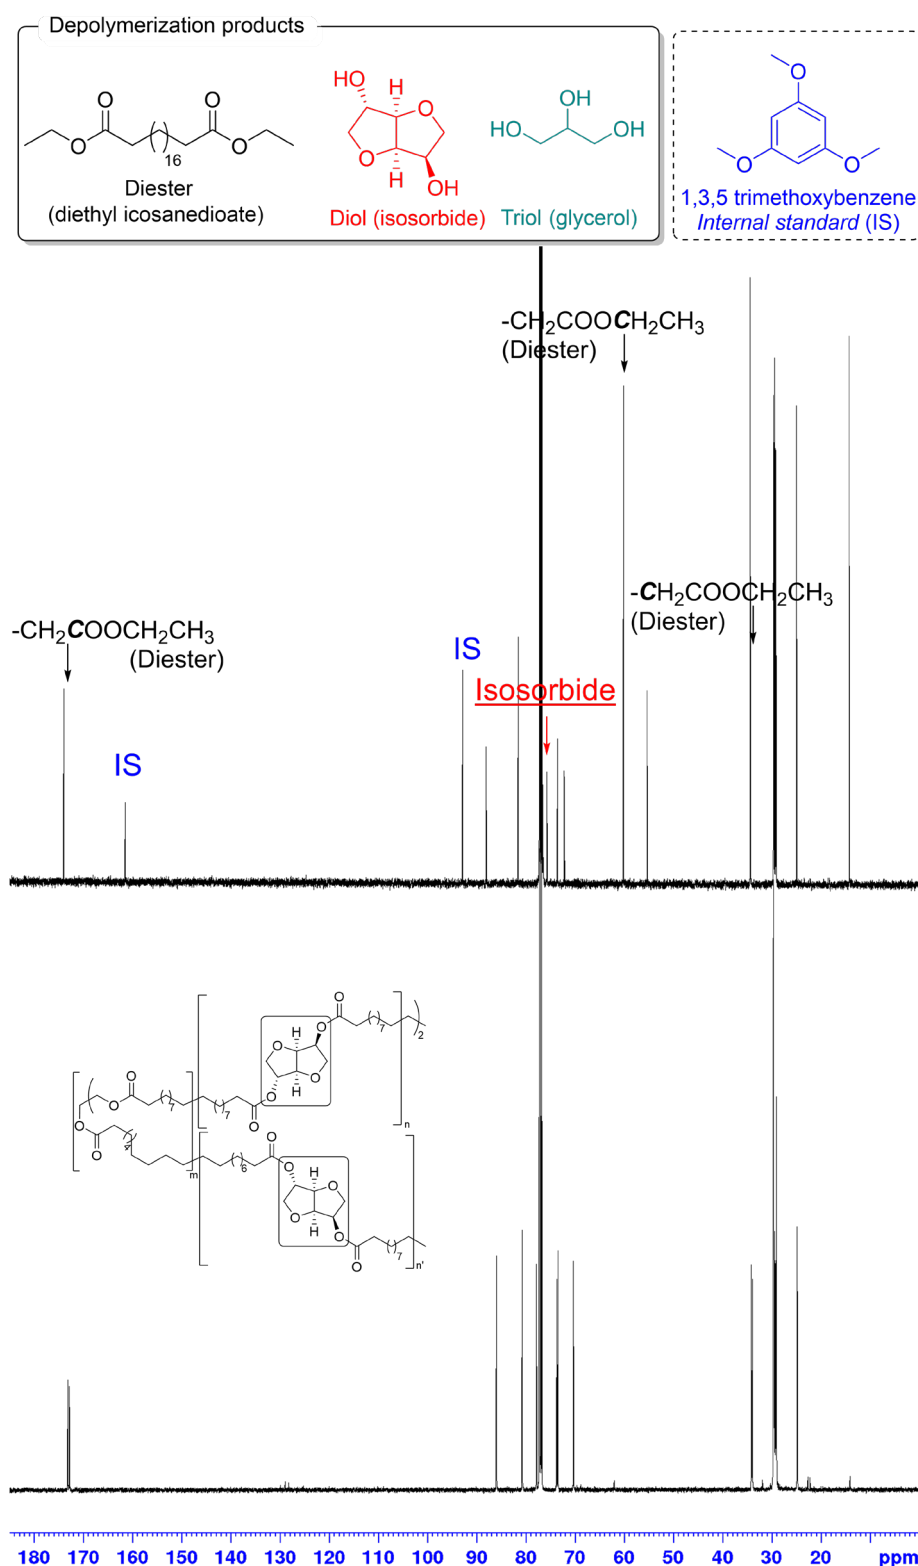

**Figure S19.** <sup>13</sup>C NMR spectrum (in CDCl<sub>3</sub> at 25 °C) of (top) depolymerized network polyester (**HCP1**, Table 2, run 41) and (bottom) network polyester (**HCP1**, Table 2, run 41). IS: Internal standard (1, 3, 5-trimethoxybenzene).

**Table S3.** Depolymerization of hydrogenated network polyesters by catalytic transesterification in ethanol using  $\text{CpTiCl}_3$ .<sup>a</sup>

| sample                   | CL<br>/ mol% | $M_n^b$<br>/ g.mol <sup>-1</sup> | $M_w/M_n^b$ | conv. <sup>c</sup><br>/ % | yield<br>isosorbide <sup>d</sup><br>/ % | yield<br>diester <sup>e</sup><br>/ % |
|--------------------------|--------------|----------------------------------|-------------|---------------------------|-----------------------------------------|--------------------------------------|
| <b>HPECL</b><br>(run 38) | 1.0          | 37,300                           | 2.92        | >99                       | >99                                     | 96                                   |
| <b>HPECL</b><br>(run 41) | 2.5          | 32,200                           | 4.39        | >99                       | >99                                     | 94                                   |

<sup>a</sup>Conditions: network polyester 100 mg, ethanol 2.0 ml,  $\text{CpTiCl}_3$  1.0 mol%, 150 °C, 24 h.

<sup>b</sup>GPC data in THF vs. polystyrene standards. <sup>c</sup>Estimated by <sup>13</sup>C NMR. <sup>d</sup>From GC yield vs. internal standard. <sup>e</sup>From <sup>1</sup>H NMR yield vs. internal standard.

## 5. Thermal properties of the prepared polyesters.

**Table S4** . Thermal properties of the prepared linear and network polyesters.

| before hydrogenation    |                        |             |                          | after hydrogenation     |                        |             |                          |
|-------------------------|------------------------|-------------|--------------------------|-------------------------|------------------------|-------------|--------------------------|
| sample no. <sup>1</sup> | $M_n^3 \times 10^{-4}$ | $M_w/M_n^3$ | $T_m^4 / ^\circ\text{C}$ | sample no. <sup>2</sup> | $M_n^3 \times 10^{-4}$ | $M_w/M_n^3$ | $T_m^4 / ^\circ\text{C}$ |
| run 1                   | 3.03                   | 2.11        | 32.7                     | run 34                  | 3.07                   | 2.22        | 72.8                     |
| run 28                  | 3.20                   | 4.48        | 31.3                     | run 42                  | 3.22                   | 4.39        | 72.7                     |
| run 24                  | 3.12                   | 2.54        | 30.8                     | run 41                  | 3.14                   | 2.46        | 73.0                     |

<sup>1</sup> Run number in Table 1. <sup>2</sup> Run number in Table 2. <sup>3</sup> GPC data in THF vs. polystyrene standards. <sup>4</sup> By DSC thermograms.

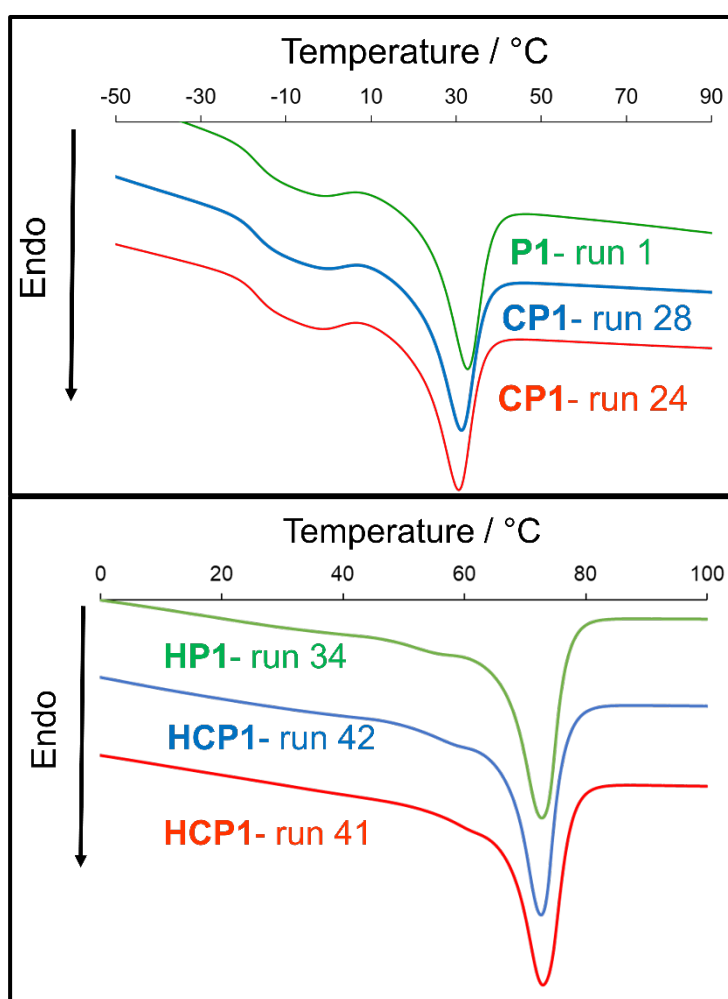

**Figure S20.** DSC thermograms of the resultant linear and network polyesters (top) ADMET polymers (bottom) after hydrogenation.

## References

1. Kojima, M.; Wang, X.; Go, L. O. P.; Makino, R.; Matsumoto, Y.; Shimoyama, D.; Abdellatif, M. M.; Kadota, J.; Higashi, S.; Hirano, H.; Nomura, K. Synthesis of high molecular weight biobased aliphatic polyesters exhibiting tensile properties beyond polyethylene. *ACS Macro Lett.* **2023**, *12*, 1403–1408.
